# Supplementary material
Source: bioRxiv or medRxiv preprint supplement (https://medrxiv.org/highwire/filestream/95958/field_highwire_adjunct_files/0/2020.09.04.20188169-1.pdf)
Supplement: Supplementary file [file 2020.09.04.20188169-1.pdf]

# Supplementary Figure 1

**a**

| Patient ID | sex | age | days after ICU admission at time of analysis | days after start of symptoms at time of analysis | other viral infections | other bacterial infections | mortality | type 2 diabetes mellitus | chronic heart failure | coronary heart disease | spike protein-specific antibodies | RBD-specific antibodies | nucleoprotein-specific antibodies |
|------------|-----|-----|----------------------------------------------|--------------------------------------------------|------------------------|----------------------------|-----------|--------------------------|-----------------------|------------------------|-----------------------------------|-------------------------|-----------------------------------|
| HC1        | m   | 42  | N/A                                          | N/A                                              | n                      | n                          | n         | n                        | n                     | n                      | n                                 | n                       | n                                 |
| HC2        | f   | 55  | N/A                                          | N/A                                              | n                      | n                          | n         | n                        | n                     | n                      | n                                 | n                       | n                                 |
| HC3        | m   | 52  | N/A                                          | N/A                                              | n                      | n                          | n         | n                        | n                     | n                      | n                                 | n                       | n                                 |
| HC4        | m   | 72  | N/A                                          | N/A                                              | n                      | n                          | n         | n                        | n                     | n                      | n                                 | N/A                     | N/A                               |
| 1          | m   | 76  | 4 / 59                                       | not available                                    | n                      | y                          | n         | n                        | n                     | y                      | n/y                               | n/y                     | n/y                               |
| 2          | f   | 91  | 5                                            | 12                                               | n                      | n                          | n         | n                        | y                     | y                      | n                                 | n                       | n                                 |
| 3          | f   | 58  | 3 / 9                                        | not available                                    | n                      | n                          | n         | y                        | n                     | n                      | n/y                               | n/y                     | n/y                               |
| 4          | f   | 76  | 9                                            | 13                                               | n                      | n                          | n         | n                        | n                     | n                      | y                                 | y                       | y                                 |
| 5          | m   | 72  | 9                                            | 23                                               | n                      | y                          | n         | n                        | n                     | y                      | y                                 | y                       | y                                 |
| 6          | m   | 79  | 12                                           | 19                                               | n                      | y                          | y         | n                        | n                     | n                      | y                                 | y                       | y                                 |
| 7          | m   | 69  | 13                                           | 19                                               | n                      | y                          | n         | y                        | n                     | n                      | y                                 | y                       | y                                 |
| 8          | f   | 83  | 3 / 18                                       | 13 / 28                                          | n                      | y                          | n         | y                        | n                     | y                      | n/y                               | n/y                     | n/y                               |
| 9          | m   | 76  | 31 / 46                                      | 36 / 51                                          | n                      | y                          | n         | n                        | n                     | n                      | y/y                               | y/y                     | y/y                               |
| 10         | f   | 77  | 5                                            | 15                                               | n                      | y                          | y         | y                        | n                     | n                      | n                                 | n                       | n                                 |
| 11         | f   | 76  | 7                                            | 36                                               | n                      | y                          | n         | n                        | n                     | n                      | y                                 | y                       | y                                 |

**b**

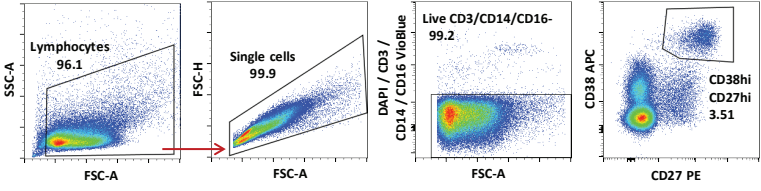

**c**

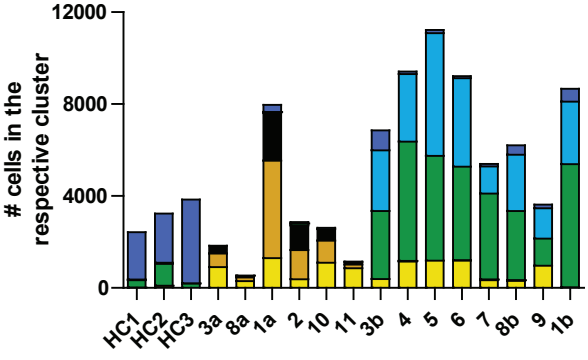

**d**

## Activation/Function

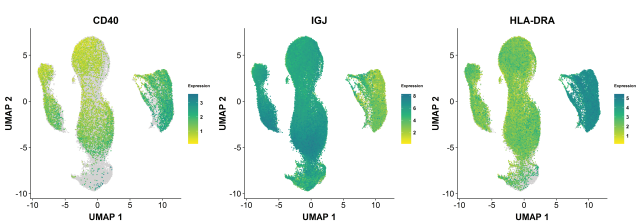

## Integrins

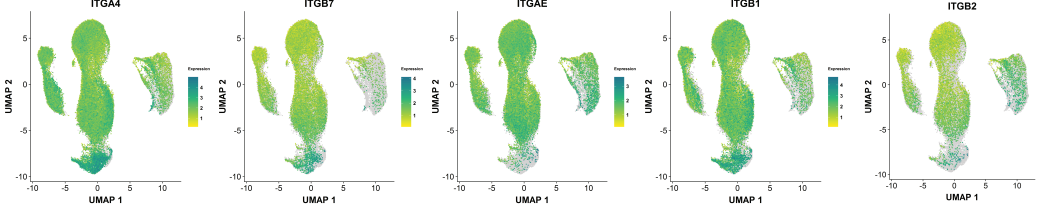

## Chemokine receptors

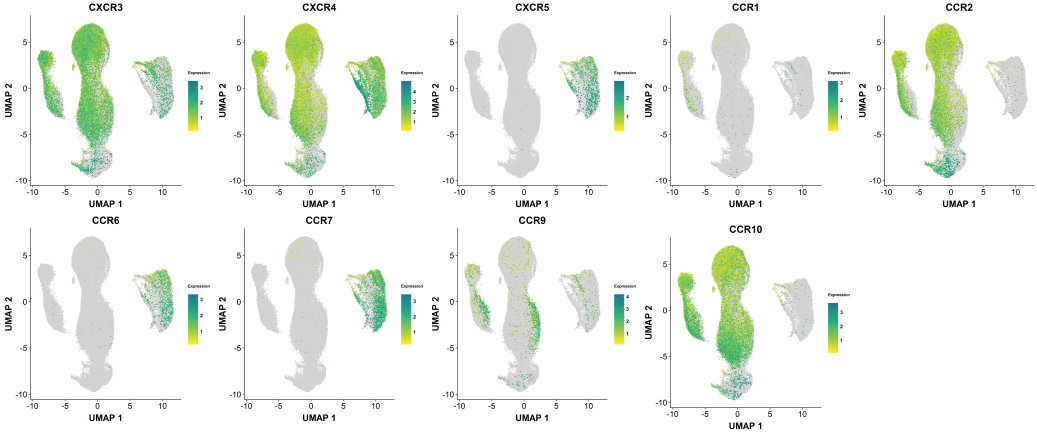

## STAT3 / SMAD associated

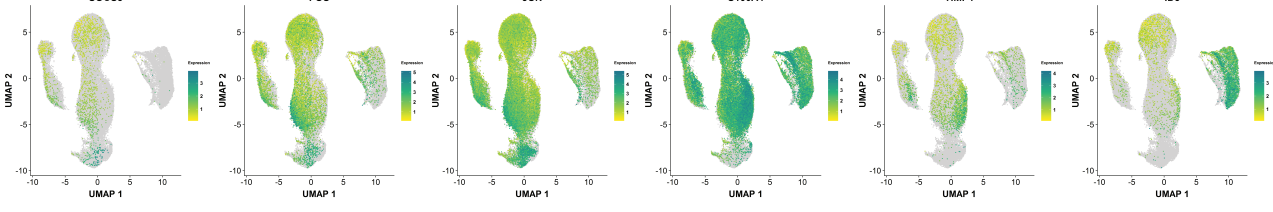

- 1. Experienced B cells
- 2. MKI67+ activated B cells
- 3. Activated B cells
- 4. Type I IFN MKI67+ activated B cells
- 5. Type I IFN activated B cells
- 6. Plasma cells
